# Supplementary material for: Structural Characterization and Association of Ovine Dickkopf-1 Gene with Wool Production and Quality Traits in Chinese Merino
Source: PubMed Central journal article supplement (PMC5748718; doi:10.3390/genes8120400), 2017-12-20
Supplement: genes-08-00400-s001.pdf [file genes-08-00400-s001.pdf]

**Table S1.** Information for *DKK1* in 16 different animal species

| Species             | Genbank mRNA accession<br>number | Location           | Genbank protein Accession<br>number | Length <sup>1</sup><br>(AA) |
|---------------------|----------------------------------|--------------------|-------------------------------------|-----------------------------|
| African clawed frog | NM_001085592.1                   | chromosome="75"    | NP_001079061.1                      | 259                         |
| Western clawed frog | NM_001016283.2                   | chromosome="7"     | NP_001016283.1                      | 257                         |
| Goat                | XM_005698161.3                   | chromosome="26"    | XP_005698218.1                      | 262                         |
| Sheep               | XM_012138945.2                   | chromosome="22"    | XP_011994335.1                      | 262                         |
| Cattle              | NM_001205544.1                   | chromosome="26"    | NP_001192473.1                      | 265                         |
| Pig                 | NM_001145384.1                   | chromosome="14"    | NP_001138856.1                      | 266                         |
| Chimpanzee          | XM_001163253.2                   | chromosome="10"    | XP_001163253.1                      | 266                         |
| Human               | NM_012242.2                      | chromosome="10"    | NP_036374.1                         | 266                         |
| Rhesus monkey       | XM_001098844.2                   | chromosome="9"     | XP_001098844.1                      | 266                         |
| Rabbit              | NM_001082737.1                   | chromosome="18"    | NP_001076206.1                      | 268                         |
| House mouse         | NM_010051.3                      | chromosome="19"    | NP_034181.2                         | 272                         |
| Norway rat          | NM_001106350.1                   | chromosome="1"     | NP_001099820.1                      | 270                         |
| Dog                 | XM_846885.2                      | chromosome="26"    | XP_851978.2                         | 252                         |
| Zebrafish           | AF116852.1                       | chromosome="12"    | AAD22461.1                          | 241                         |
| Chicken             | XM_421563.2                      | chromosome="6"     | XP_421563.2                         | 338                         |
| Atlantic salmon     | NM_001141456.1                   | chromosome="ssa19" | NP_001134928.1                      | 169                         |

Length<sup>1</sup> = DKK1 protein length (amino acids) in 16 different animals.

**Table S2.** The similarities of the deduced amino acid sequences of DKK1 protein in 16 different animal species

| Species             | 2  | 3  | 4         | 5         | 6         | 7         | 8         | 9         | 10        | 11        | 12        | 13        | 14        | 15        | 16        |
|---------------------|----|----|-----------|-----------|-----------|-----------|-----------|-----------|-----------|-----------|-----------|-----------|-----------|-----------|-----------|
| African clawed frog | 94 | 49 | <b>49</b> | 51        | 53        | 53        | 53        | 54        | 54        | 51        | 51        | 50        | 48        | 35        | 30        |
| Western clawed frog | -  | 50 | <b>50</b> | 51        | 54        | 54        | 55        | 54        | 54        | 52        | 51        | 51        | 49        | 35        | 29        |
| Goat                | -  | -  | <b>98</b> | 90        | 83        | 83        | 83        | 83        | 79        | 73        | 72        | 69        | 47        | 37        | 31        |
| Sheep               | -  | -  | -         | <b>90</b> | <b>83</b> | <b>83</b> | <b>83</b> | <b>83</b> | <b>80</b> | <b>72</b> | <b>73</b> | <b>69</b> | <b>48</b> | <b>36</b> | <b>31</b> |
| Cattle              | -  | -  | -         | -         | 89        | 90        | 89        | 90        | 84        | 77        | 78        | 70        | 44        | 37        | 32        |
| Pig                 | -  | -  | -         | -         | -         | 91        | 90        | 91        | 87        | 87        | 81        | 73        | 45        | 38        | 33        |
| Chimpanzee          | -  | -  | -         | -         | -         | -         | 99        | 99        | 88        | 81        | 81        | 78        | 46        | 36        | 32        |
| Human               | -  | -  | -         | -         | -         | -         | -         | 98        | 87        | 81        | 81        | 70        | 46        | 36        | 32        |
| Rhesus monkey       | -  | -  | -         | -         | -         | -         | -         | -         | 88        | 80        | 81        | 70        | 45        | 36        | 31        |
| Rabbit              | -  | -  | -         | -         | -         | -         | -         | -         | -         | 80        | 82        | 70        | 45        | 37        | 32        |
| House mouse         | -  | -  | -         | -         | -         | -         | -         | -         | -         | -         | 93        | 67        | 45        | 38        | 30        |
| Norway rat          | -  | -  | -         | -         | -         | -         | -         | -         | -         | -         | -         | 67        | 45        | 38        | 31        |
| Dog                 | -  | -  | -         | -         | -         | -         | -         | -         | -         | -         | -         | -         | 44        | 34        | 33        |
| Zebrafish           | -  | -  | -         | -         | -         | -         | -         | -         | -         | -         | -         | -         | -         | 34        | 41        |
| Chicken             | -  | -  | -         | -         | -         | -         | -         | -         | -         | -         | -         | -         | -         | -         | 25        |
| Atlantic salmon     | -  | -  | -         | -         | -         | -         | -         | -         | -         | -         | -         | -         | -         | -         | -         |

The numbers 2 to16 represent Western clawed frog, Goat, Sheep, Cattle, Pig, Chimpanzee, Human, Rhesus monkey, Rabbit, House mouse, Norway rat, Dog, Zebrafish, Chicken and Atlantic salmon, respectively.



|       |    |     |       |       |       |       |       |                              |
|-------|----|-----|-------|-------|-------|-------|-------|------------------------------|
|       | PM | 128 | 0.039 | 0.344 | 0.617 | 0.211 | 0.789 |                              |
|       |    |     | AA    | AG    | GG    | A     | G     |                              |
|       | SF | 180 | 0.122 | 0.411 | 0.467 | 0.328 | 0.672 |                              |
|       | PW | 138 | 0.087 | 0.514 | 0.399 | 0.344 | 0.656 |                              |
| SNP7  | A  | 148 | 0.128 | 0.432 | 0.439 | 0.345 | 0.654 | $\chi^2=36.97$               |
|       | B  | 102 | 0.176 | 0.559 | 0.265 | 0.456 | 0.544 | ( $P=6.07 \times 10^{-7}$ )  |
|       | U  | 35  | 0.143 | 0.286 | 0.571 | 0.286 | 0.714 |                              |
|       | PM | 130 | 0.023 | 0.346 | 0.631 | 0.196 | 0.804 |                              |
|       |    |     | CC    | CT    | TT    | C     | T     |                              |
|       | SF | 137 | 0.007 | 0.292 | 0.701 | 0.153 | 0.847 |                              |
|       | PW | 108 | 0.019 | 0.343 | 0.639 | 0.190 | 0.810 |                              |
| SNP8  | A  | 108 | 0.065 | 0.407 | 0.528 | 0.269 | 0.731 | $\chi^2=22.36$               |
|       | B  | 78  | 0.038 | 0.333 | 0.628 | 0.205 | 0.795 | ( $P=4.48 \times 10^{-4}$ )  |
|       | U  | 29  | 0.172 | 0.448 | 0.379 | 0.397 | 0.603 |                              |
|       | PM | 96  | 0.031 | 0.406 | 0.563 | 0.234 | 0.766 |                              |
|       |    |     | CC    | CT    | TT    | C     | T     |                              |
|       | SF | 174 | 0.230 | 0.460 | 0.310 | 0.460 | 0.540 |                              |
|       | PW | 132 | 0.205 | 0.606 | 0.189 | 0.508 | 0.492 |                              |
| SNP9  | A  | 142 | 0.338 | 0.444 | 0.218 | 0.560 | 0.440 | $\chi^2=32.72$               |
|       | B  | 89  | 0.416 | 0.449 | 0.135 | 0.640 | 0.360 | ( $P=4.26 \times 10^{-6}$ )  |
|       | U  | 34  | 0.412 | 0.412 | 0.176 | 0.618 | 0.382 |                              |
|       | PM | 127 | 0.165 | 0.480 | 0.354 | 0.406 | 0.594 |                              |
|       |    |     | TT    | TC    | CC    | T     | C     |                              |
|       | SF | 169 | 0.207 | 0.284 | 0.509 | 0.349 | 0.651 |                              |
|       | PW | 126 | 0.175 | 0.365 | 0.460 | 0.357 | 0.643 |                              |
| SNP10 | A  | 140 | 0.300 | 0.257 | 0.443 | 0.429 | 0.571 | $\chi^2=75.93$               |
|       | B  | 95  | 0.295 | 0.432 | 0.274 | 0.511 | 0.489 | ( $P=5.95 \times 10^{-15}$ ) |
|       | U  | 30  | 0.300 | 0.200 | 0.500 | 0.400 | 0.600 |                              |
|       | PM | 119 | 0.034 | 0.210 | 0.756 | 0.139 | 0.861 |                              |

|       |    |     | TT    | TC    | CC    | T     | C     |                              |
|-------|----|-----|-------|-------|-------|-------|-------|------------------------------|
|       | SF | 166 | 0.554 | 0.024 | 0.422 | 0.566 | 0.434 |                              |
|       | PW | 128 | 0.523 | 0.070 | 0.406 | 0.559 | 0.441 |                              |
| SNP11 | A  | 141 | 0.525 | 0.057 | 0.418 | 0.553 | 0.447 | $\chi^2=53.05$               |
|       | B  | 98  | 0.602 | 0.092 | 0.306 | 0.648 | 0.352 | ( $P=3.28 \times 10^{-10}$ ) |
|       | U  | 34  | 0.441 | 0.000 | 0.559 | 0.441 | 0.559 |                              |
|       | PM | 108 | 0.287 | 0.074 | 0.639 | 0.324 | 0.676 |                              |

<sup>1</sup> SNP2 is good surrogates for SNP1 and SNP4, SNP2 is a haplotype tag SNP (ht SNP); <sup>2</sup> SF, PW, A, B, U and PM represent Super fine wool strain, Prolific wool strain, A strain, B strain, U strain and the Prolific meat strain, respectively; <sup>3</sup> The numbers shown in parentheses indicate the *P* value.

**Table S4. Haplotype frequencies of *DKK1* in Chinese Merino**

| Haplotype Frequencies | Lines  |        |        |        |        |        |
|-----------------------|--------|--------|--------|--------|--------|--------|
|                       | A      | B      | PW     | PM     | U      | SF     |
| H1:AAICGAGCCCC        | 8.67%  | 3.96%  | 10.14% | 4.72%  | 14.71% | 7.82%  |
| H2:AAICTAATCTT        | 19.33% | 26.73% | 5.80%  | 3.94%  | 26.47% | 17.32% |
| H3:GCDGGAATCTT        | 18.00% | 32.67% | 36.96% | 18.90% | 11.76% | 24.58% |
| H4:GCDGGGGCCCC        | 0.00%  | 3.96%  | 5.80%  | 23.62% | 11.76% | 1.68%  |
| H5:GCDGGGGTTCC        | 24.00% | 18.81% | 21.74% | 40.94% | 17.65% | 32.96% |
| H6:AAICGAGCCTT        | 6.00%  | 0.99%  | 3.62%  | 0.00%  | 5.88%  | 3.91%  |
| H7:AAICTGGCCCC        | 6.00%  | 0.99%  | 3.62%  | 1.57%  | 5.88%  | 3.35%  |
| H8:AAICTGGCCTC        | 7.33%  | 8.91%  | 5.07%  | 2.36%  | 2.94%  | 2.23%  |
| H9:GCDGGAACCCCT       | 7.33%  | 0.99%  | 5.80%  | 3.15%  | 2.94%  | 4.47%  |
| H10:GCDGGAACCTT       | 2.67%  | 0.99%  | 0.72%  | 0.00%  | 0.00%  | 0.00%  |
| H11:GCDGGGGTTCT       | 0.67%  | 0.00%  | 0.72%  | 0.79%  | 0.00%  | 1.68%  |
| H12:GCIGGAATCTT       | 0.00%  | 0.99%  | 0.00%  | 0.00%  | 0.00%  | 0.00%  |

SF, PW, A, B, U and PM represent Super fine wool strain, Prolific wool strain, A strain, B strain, U strain and the Prolific meat strain, respectively.

**Table S5.** Genetic (below diagonal) and phenotypic (above diagonal) correlation coefficients between wool production and quality traits

|           | MFD           | FDSD          | CVFD         | Curvature     | FW            | WFL           |
|-----------|---------------|---------------|--------------|---------------|---------------|---------------|
| MFD       |               | 0.57±0.026**  | -0.04±0.036  | -0.41±0.030** | 0.11±0.048*   | 0.05±0.037    |
| FDSD      | 0.83±0.148**  |               | 0.78±0.013** | -0.41±0.031** | 0.16±0.049**  | 0.02±0.037    |
| CVFD      | 0.27±0.341**  | 0.73±0.130**  |              | -0.21±0.035** | -0.11±0.019*  | -0.01±0.037   |
| Curvature | -0.79±0.151** | -0.79±0.187** | -0.43±0.290  |               | -0.11±0.049** | -0.20±0.036** |
| FW        | 0.10±0.156**  | 0.04±0.175**  | -0.30±0.083* | -0.17±0.130** |               | 0.27±0.047**  |
| WFL       | 0.13±0.171**  | 0.14±0.189**  | 0.27±0.274*  | -0.20±0.135** | 0.70±0.200**  |               |

MFD, mean wool fiber diameter; FDSD, standard deviation of fiber diameter; CVFD, coefficient of variation of fiber diameter; WFL, wool fiber length; FW, fleece weight; \* Significant  $P < 0.05$ ; \*\* Significant  $P < 0.01$ ; SF, PW, A, B, U and PM represent Super fine wool strain, Prolific wool strain, A strain, B strain, U strain and the Prolific meat strain, respectively.

**Table S6. A summary of the phenotypic data**

| Traits                 | Lines | Mean  | SD    | range  | CV    | SE    |
|------------------------|-------|-------|-------|--------|-------|-------|
| MFD ( $\mu\text{m}$ )  | A     | 21.10 | 1.806 | 10.200 | 3.262 | 0.147 |
|                        | B     | 20.48 | 1.855 | 9.740  | 3.440 | 0.183 |
|                        | PW    | 20.97 | 1.747 | 10.600 | 3.053 | 0.149 |
|                        | PM    | 20.55 | 1.494 | 7.250  | 2.232 | 0.129 |
|                        | U     | 21.26 | 2.026 | 10.960 | 4.105 | 0.338 |
|                        | SF    | 19.03 | 1.736 | 10.200 | 3.014 | 0.129 |
| FDSD ( $\mu\text{m}$ ) | A     | 4.33  | 0.637 | 3.550  | 0.406 | 0.052 |
|                        | B     | 4.19  | 0.577 | 2.860  | 0.333 | 0.057 |
|                        | PW    | 4.16  | 0.646 | 3.940  | 0.418 | 0.055 |
|                        | PM    | 4.20  | 0.641 | 3.540  | 0.411 | 0.055 |
|                        | U     | 4.30  | 0.640 | 2.760  | 0.410 | 0.107 |
|                        | SF    | 3.67  | 0.489 | 2.350  | 0.239 | 0.036 |
| CVFD                   | A     | 20.60 | 2.495 | 14.000 | 6.225 | 0.203 |
|                        | B     | 20.49 | 2.602 | 13.600 | 6.771 | 0.256 |
|                        | PW    | 19.84 | 2.758 | 14.800 | 7.608 | 0.235 |
|                        | PM    | 20.48 | 3.102 | 18.300 | 9.623 | 0.268 |
|                        | U     | 20.26 | 2.520 | 8.700  | 6.349 | 0.420 |
|                        | SF    | 19.24 | 2.255 | 16.700 | 5.084 | 0.168 |
| Curvature ( /2.5 cm)   | A     | 11.28 | 1.621 | 11.000 | 2.629 | 0.132 |
|                        | B     | 11.86 | 2.044 | 10.000 | 4.177 | 0.201 |
|                        | PW    | 11.82 | 1.877 | 9.000  | 3.522 | 0.160 |
|                        | PM    | 12.00 | 2.397 | 18.000 | 5.744 | 0.207 |
|                        | U     | 11.47 | 1.934 | 9.000  | 3.742 | 0.322 |
|                        | SF    | 14.94 | 2.134 | 9.000  | 4.552 | 0.159 |
| FW (kg)                | A     | 4.77  | 0.812 | 3.700  | 0.660 | 0.091 |
|                        | B     | 5.01  | 0.814 | 3.400  | 0.663 | 0.115 |
|                        | PW    | 4.33  | 0.778 | 4.300  | 0.605 | 0.097 |
|                        | PM    | 3.48  | 0.800 | 3.700  | 0.640 | 0.094 |
|                        | U     | 4.76  | 1.033 | 3.600  | 1.068 | 0.258 |
|                        | SF    | 4.51  | 0.794 | 3.800  | 0.630 | 0.076 |
| WFL (cm)               | A     | 9.50  | 1.270 | 6.000  | 1.612 | 0.103 |
|                        | B     | 9.50  | 1.270 | 6.000  | 1.614 | 0.125 |
|                        | PW    | 9.42  | 1.308 | 6.500  | 1.710 | 0.111 |
|                        | PM    | 8.70  | 1.244 | 7.000  | 1.547 | 0.107 |
|                        | U     | 9.49  | 1.371 | 6.000  | 1.878 | 0.228 |
|                        | SF    | 9.20  | 1.100 | 6.000  | 1.210 | 0.082 |

MFD, mean wool fiber diameter; FDSD, standard deviation of fiber diameter; CVFD, coefficient of variation of fiber diameter; WFL, wool fiber length; FW, fleece weight; SF, PW, A, B, U and PM represent Super fine wool strain, Prolific wool strain, A strain, B strain, U strain and the Prolific meat strain, respectively.



**Table S7. The least square means of the line effects of *DKK1* SNPs in six Chinese Merino strains**

| Traits | Lines               |                          |                          |                          |                          |                          |                          |
|--------|---------------------|--------------------------|--------------------------|--------------------------|--------------------------|--------------------------|--------------------------|
|        | A                   | B                        | PW                       | PM                       | U                        | SF                       |                          |
| SNP1   | MFD (μm)            | 20.88±0.429 <sup>a</sup> | 20.12±0.525 <sup>a</sup> | 21.95±0.330 <sup>a</sup> | 21.29±0.461 <sup>a</sup> | 22.46±0.732 <sup>a</sup> | 19.25±0.540 <sup>a</sup> |
|        | FDSD (μm)           | 4.37±0.143 <sup>a</sup>  | 3.97±0.174 <sup>a</sup>  | 4.39±0.110 <sup>a</sup>  | 4.57±0.153 <sup>a</sup>  | 4.39±0.244 <sup>a</sup>  | 3.71±0.180 <sup>a</sup>  |
|        | CVFD                | 20.98±0.584              | 19.72±0.714              | 20.02±0.450              | 21.44±0.628              | 19.47±0.997              | 19.19±0.736              |
|        | Curvature (/2.5 cm) | 11.42±0.444 <sup>a</sup> | 13.21±0.542 <sup>b</sup> | 11.25±0.342 <sup>a</sup> | 11.36±0.476 <sup>a</sup> | 11.84±0.757 <sup>a</sup> | 15.30±0.558 <sup>a</sup> |
|        | FW (kg)             | 4.89±0.171 <sup>a</sup>  | 4.87±0.218 <sup>a</sup>  | 4.24±0.143 <sup>a</sup>  | 3.58±0.189 <sup>d</sup>  | 4.70±0.301 <sup>a</sup>  | 4.31±0.225 <sup>a</sup>  |
|        | WFL (cm)            | 9.06±0.258               | 9.15±0.316               | 8.66±0.199               | 8.18±0.277               | 9.03±0.441               | 9.45±0.325               |
| SNP2   | MFD (μm)            | 20.86±0.430 <sup>b</sup> | 20.01±0.531 <sup>b</sup> | 21.95±0.332 <sup>a</sup> | 20.51±0.600 <sup>b</sup> | 21.71±0.727 <sup>a</sup> | 19.25±0.541 <sup>c</sup> |
|        | FDSD (μm)           | 4.37±0.143 <sup>a</sup>  | 3.94±0.177 <sup>a</sup>  | 4.39±0.110 <sup>a</sup>  | 4.40±0.200 <sup>a</sup>  | 4.24±0.242 <sup>a</sup>  | 3.70±0.180 <sup>a</sup>  |
|        | CVFD                | 21.00±0.588              | 19.69±0.727              | 20.02±0.454              | 21.45±0.822              | 19.45±0.995              | 19.16±0.740              |
|        | Curvature (/2.5 cm) | 11.44±0.452 <sup>a</sup> | 13.27±0.558 <sup>b</sup> | 11.25±0.349 <sup>a</sup> | 12.65±0.631 <sup>b</sup> | 11.59±0.764 <sup>a</sup> | 15.28±0.569 <sup>a</sup> |
|        | FW (kg)             | 4.89±0.170 <sup>a</sup>  | 4.79±0.220 <sup>a</sup>  | 4.24±0.143 <sup>a</sup>  | 3.31±0.245 <sup>d</sup>  | 4.21±0.297 <sup>a</sup>  | 4.34±0.224 <sup>a</sup>  |
|        | WFL (cm)            | 9.05±0.258               | 9.08±0.318               | 8.66±0.199               | 8.06±0.360               | 8.48±0.436               | 9.46±0.324               |
| SNP3   | MFD(μm)             | 20.77±0.389 <sup>b</sup> | 20.02±0.561 <sup>b</sup> | 21.41±0.493 <sup>a</sup> | 21.04±0.643 <sup>a</sup> | 22.30±0.587 <sup>a</sup> | 18.91±0.357 <sup>a</sup> |
|        | FDSD (μm)           | 4.30±0.136 <sup>a</sup>  | 3.89±0.196 <sup>a</sup>  | 4.31±0.172 <sup>a</sup>  | 4.25±0.225 <sup>a</sup>  | 4.46±0.205 <sup>a</sup>  | 3.60±0.125 <sup>a</sup>  |
|        | CVFD                | 20.76±0.575              | 19.41±0.830              | 20.10±0.731              | 20.18±0.952              | 20.02±0.869              | 19.02±0.529              |
|        | Curvature(/2.5 cm)  | 11.49±0.414 <sup>a</sup> | 13.53±0.597 <sup>b</sup> | 11.00±0.526 <sup>a</sup> | 11.65±0.685 <sup>a</sup> | 10.36±0.625 <sup>a</sup> | 15.56±0.380 <sup>a</sup> |
|        | FW(kg)              | 4.74±0.168 <sup>a</sup>  | 4.79±0.252 <sup>a</sup>  | 4.14±0.216 <sup>a</sup>  | 3.10±0.278 <sup>a</sup>  | 4.21±0.254 <sup>a</sup>  | 4.37±0.157 <sup>a</sup>  |
|        | WFL(cm)             | 9.11±0.251               | 9.06±0.362               | 8.90±0.319               | 8.06±0.415               | 9.55±0.379               | 9.15±0.231               |
| SNP4   | MFD (μm)            | 21.06±0.409 <sup>a</sup> | 20.11±0.514 <sup>a</sup> | 21.96±0.329 <sup>a</sup> | 21.05±0.523 <sup>a</sup> | 21.71±0.711 <sup>a</sup> | 19.24±0.529 <sup>a</sup> |
|        | FDSD (μm)           | 4.35±0.137 <sup>a</sup>  | 3.96±0.172 <sup>a</sup>  | 4.36±0.110 <sup>a</sup>  | 4.60±0.175 <sup>a</sup>  | 4.24±0.238 <sup>a</sup>  | 3.70±0.177 <sup>a</sup>  |
|        | CVFD                | 20.69±0.566              | 19.69±0.713              | 19.88±0.455              | 21.87±0.724              | 19.45±0.985              | 19.16±0.733              |
|        | Curvature (/2.5 cm) | 11.39±0.445 <sup>a</sup> | 13.25±0.560 <sup>b</sup> | 11.29±0.357 <sup>a</sup> | 11.86±0.569 <sup>a</sup> | 11.60±0.773 <sup>a</sup> | 15.29±0.575 <sup>a</sup> |
|        | FW (kg)             | 4.86±0.160 <sup>a</sup>  | 4.84±0.216 <sup>a</sup>  | 4.22±0.145 <sup>a</sup>  | 3.38±0.217 <sup>d</sup>  | 4.20±0.295 <sup>a</sup>  | 4.33±0.222 <sup>a</sup>  |
|        | WFL (cm)            | 9.18±0.251 <sup>a</sup>  | 9.15±0.316 <sup>a</sup>  | 8.67±0.202 <sup>a</sup>  | 8.05±0.321 <sup>a</sup>  | 8.48±0.437 <sup>a</sup>  | 9.46±0.325 <sup>a</sup>  |
| SNP5   | MFD (μm)            | 20.97±0.398 <sup>a</sup> | 20.17±0.519 <sup>a</sup> | 21.95±0.429 <sup>a</sup> | 20.24±0.771 <sup>a</sup> | 21.80±0.809 <sup>a</sup> | 19.53±0.538 <sup>a</sup> |
|        | FDSD (μm)           | 4.33±0.134 <sup>a</sup>  | 3.90±0.174 <sup>a</sup>  | 4.27±0.144 <sup>a</sup>  | 4.12±0.259 <sup>a</sup>  | 4.54±0.272 <sup>a</sup>  | 3.75±0.181 <sup>a</sup>  |
|        | CVFD                | 20.69±0.543              | 19.34±0.709              | 19.48±0.587              | 20.29±1.053              | 20.94±1.105              | 19.17±0.735              |
|        | Curvature (/2.5 cm) | 11.43±0.442 <sup>a</sup> | 13.04±0.570 <sup>b</sup> | 11.66±0.477 <sup>a</sup> | 12.83±0.856 <sup>a</sup> | 11.01±0.898 <sup>a</sup> | 15.28±0.598 <sup>a</sup> |
|        | FW (kg)             | 4.81±0.164 <sup>a</sup>  | 4.66±0.224 <sup>a</sup>  | 4.39±0.193 <sup>a</sup>  | 2.90±0.327 <sup>a</sup>  | 4.76±0.343 <sup>a</sup>  | 4.29±0.233 <sup>a</sup>  |
|        | WFL (cm)            | 9.22±0.251 <sup>a</sup>  | 8.91±0.327 <sup>a</sup>  | 8.39±0.271 <sup>b</sup>  | 7.91±0.486 <sup>a</sup>  | 9.96±0.510 <sup>a</sup>  | 9.50±0.339 <sup>a</sup>  |
| SNP6   | MFD(μm)             | 21.19±0.358 <sup>a</sup> | 21.08±0.465 <sup>a</sup> | 21.95±0.465 <sup>a</sup> | 20.84±0.692 <sup>a</sup> | 18.96±0.310 <sup>b</sup> | NE                       |
|        | FDSD (μm)           | 4.20±0.155 <sup>a</sup>  | 4.21±0.155 <sup>a</sup>  | 4.21±0.231 <sup>a</sup>  | 3.67±0.104 <sup>a</sup>  | 20.44±0.471 <sup>b</sup> | NE                       |
|        | CVFD                | 19.15±0.611              | 20.10±0.910              | 19.30±0.408              | 11.56±0.387              | 11.85±0.502              | NE                       |

|       |                     |                          |                          |                          |                          |                          |                          |
|-------|---------------------|--------------------------|--------------------------|--------------------------|--------------------------|--------------------------|--------------------------|
|       | Curvature (/2.5 cm) | 12.10±0.747 <sup>a</sup> | 15.31±0.335 <sup>b</sup> | 4.83±0.140 <sup>b</sup>  | 4.88±0.221 <sup>b</sup>  | 4.47±0.197 <sup>a</sup>  | NE                       |
|       | FW (kg)             | 4.49±0.133 <sup>a</sup>  | 9.34±0.230 <sup>a</sup>  | 9.57±0.298 <sup>a</sup>  | 9.26±0.298 <sup>b</sup>  | 7.82±0.444 <sup>a</sup>  | NE                       |
|       | WFL (cm)            | 9.22±0.251 <sup>a</sup>  | 8.91±0.327 <sup>a</sup>  | 8.39±0.271 <sup>a</sup>  | 7.91±0.486 <sup>b</sup>  | 9.96±0.510 <sup>a</sup>  | NE                       |
|       |                     | A                        | B                        | PW                       | PM                       | U                        | SF                       |
| SNP7  | MFD (µm)            | 20.99±0.400 <sup>b</sup> | 20.51±0.511 <sup>b</sup> | 21.79±0.500 <sup>b</sup> | 20.53±0.583 <sup>b</sup> | 22.39±0.695 <sup>a</sup> | 18.53±0.355 <sup>c</sup> |
|       | FDSD (µm)           | 4.30±0.133 <sup>a</sup>  | 4.16±0.170 <sup>a</sup>  | 4.18±0.166 <sup>a</sup>  | 4.44±0.194 <sup>a</sup>  | 4.42±0.231 <sup>a</sup>  | 3.63±0.118 <sup>b</sup>  |
|       | CVFD                | 20.51±0.541              | 20.25±0.690              | 19.21±0.675              | 21.63±0.788              | 19.72±0.939              | 19.59±0.480              |
|       | Curvature (/2.5 cm) | 11.49±0.432 <sup>b</sup> | 12.13±0.552 <sup>b</sup> | 10.90±0.540 <sup>b</sup> | 12.24±0.630 <sup>b</sup> | 11.29±0.751 <sup>b</sup> | 15.39±0.384 <sup>a</sup> |
|       | FW (kg)             | 4.75±0.159 <sup>a</sup>  | 4.80±0.257 <sup>a</sup>  | 4.12±0.208 <sup>b</sup>  | 3.23±0.238 <sup>c</sup>  | 4.61±0.284 <sup>b</sup>  | 4.46±0.146 <sup>b</sup>  |
|       | WFL (cm)            | 9.14±0.242               | 9.44±0.309               | 9.17±0.302               | 8.08±0.353               | 9.12±0.420               | 8.90±0.215               |
|       |                     | A                        | B                        | PW                       | PM                       | U                        | SF                       |
| SNP8  | MFD(µm)             | 20.33±0.549 <sup>b</sup> | 20.34±0.499 <sup>b</sup> | 21.99±0.495 <sup>a</sup> | 21.11±0.477 <sup>b</sup> | 21.14±0.741 <sup>b</sup> | 19.02±0.347 <sup>c</sup> |
|       | FDSD (µm)           | 4.30±0.177 <sup>a</sup>  | 4.17±0.161 <sup>a</sup>  | 4.37±0.160 <sup>a</sup>  | 4.39±0.154 <sup>a</sup>  | 4.19±0.239 <sup>a</sup>  | 3.61±0.112 <sup>b</sup>  |
|       | CVFD                | 21.18±0.727              | 20.61±0.661              | 19.86±0.656              | 20.79±0.632              | 19.79±0.981              | 18.95±0.460              |
|       | Curvature (/2.5 cm) | 11.71±0.570 <sup>b</sup> | 11.96±0.518 <sup>b</sup> | 11.45±0.514 <sup>b</sup> | 10.96±0.495 <sup>b</sup> | 11.97±0.769 <sup>b</sup> | 15.27±0.360 <sup>a</sup> |
|       | FW (kg)             | 4.95±0.201 <sup>a</sup>  | 4.95±0.195 <sup>a</sup>  | 4.59±0.191 <sup>b</sup>  | 3.72±0.182 <sup>c</sup>  | 4.13±0.282 <sup>b</sup>  | 4.36±0.135 <sup>b</sup>  |
|       | WFL (cm)            | 9.24±0.333 <sup>b</sup>  | 9.50±0.303 <sup>a</sup>  | 8.23±0.300 <sup>c</sup>  | 8.26±0.289 <sup>c</sup>  | 8.44±0.449 <sup>b</sup>  | 9.06±0.210 <sup>b</sup>  |
|       |                     | A                        | B                        | PW                       | PM                       | U                        | SF                       |
| SNP9  | MFD (µm)            | 20.64±0.349 <sup>b</sup> | 20.37±0.412 <sup>b</sup> | 21.62±0.381 <sup>a</sup> | 21.01±0.341 <sup>b</sup> | 20.60±0.821 <sup>b</sup> | 18.68±0.304 <sup>c</sup> |
|       | FDSD (µm)           | 4.32±0.124 <sup>a</sup>  | 4.02±0.146 <sup>a</sup>  | 4.34±0.135 <sup>a</sup>  | 4.37±0.121 <sup>a</sup>  | 3.95±0.291 <sup>b</sup>  | 3.66±0.108 <sup>b</sup>  |
|       | CVFD                | 20.98±0.514              | 19.81±0.607              | 20.11±0.561              | 20.76±0.502              | 19.36±1.208              | 19.54±0.447              |
|       | Curvature (/2.5 cm) | 11.40±0.396 <sup>b</sup> | 12.71±0.468 <sup>b</sup> | 11.14±0.432 <sup>b</sup> | 11.71±0.387 <sup>b</sup> | 13.55±0.931 <sup>a</sup> | 15.17±0.344 <sup>a</sup> |
|       | FW (kg)             | 4.86±0.151 <sup>a</sup>  | 4.91±0.188 <sup>a</sup>  | 4.06±0.188 <sup>b</sup>  | 3.46±0.152 <sup>c</sup>  | 4.63±0.366 <sup>b</sup>  | 4.43±0.137 <sup>b</sup>  |
|       | WFL (cm)            | 9.38±0.226 <sup>a</sup>  | 9.36±0.268 <sup>a</sup>  | 8.95±0.247 <sup>a</sup>  | 8.12±0.221 <sup>b</sup>  | 8.96±0.532 <sup>b</sup>  | 9.05±0.197 <sup>a</sup>  |
|       |                     | A                        | B                        | PW                       | PM                       | SF                       | U                        |
| SNP10 | MFD (µm)            | 21.04±0.339 <sup>b</sup> | 20.52±0.382 <sup>b</sup> | 22.36±0.437 <sup>a</sup> | 21.22±0.485 <sup>b</sup> | 18.91±0.301 <sup>c</sup> | NE                       |
|       | FDSD (µm)           | 4.06±0.120 <sup>a</sup>  | 4.34±0.138 <sup>a</sup>  | 4.07±0.153 <sup>a</sup>  | 3.65±0.095 <sup>a</sup>  | 20.53±0.432 <sup>b</sup> | NE                       |
|       | CVFD                | 19.38±0.558              | 19.14±0.620              | 19.28±0.385              | 11.52±0.363              | 12.28±0.410              | NE                       |
|       | Curvature (/2.5 cm) | 11.65±0.521 <sup>b</sup> | 15.41±0.324 <sup>b</sup> | 4.78±0.129 <sup>b</sup>  | 4.94±0.158 <sup>b</sup>  | 4.50±0.188 <sup>a</sup>  | NE                       |
|       | FW (kg)             | 4.58±0.124 <sup>a</sup>  | 9.25±0.220 <sup>a</sup>  | 9.37±0.248 <sup>a</sup>  | 9.19±0.284 <sup>a</sup>  | 8.18±0.315 <sup>a</sup>  | NE                       |
|       | WFL (cm)            | 9.24±0.333 <sup>a</sup>  | 9.50±0.303 <sup>a</sup>  | 8.23±0.300 <sup>a</sup>  | 8.26±0.289 <sup>b</sup>  | 8.44±0.449 <sup>a</sup>  | NE                       |
|       |                     | A                        | B                        | PW                       | PM                       | U                        | SF                       |
| SNP11 | MFD (µm)            | 20.92±0.444 <sup>b</sup> | 20.16±0.497 <sup>b</sup> | 22.03±0.378 <sup>a</sup> | 21.08±0.457 <sup>b</sup> | 22.39±0.698 <sup>a</sup> | 19.59±0.466 <sup>c</sup> |
|       | FDSD (µm)           | 4.39±0.142 <sup>a</sup>  | 4.04±0.159 <sup>b</sup>  | 4.33±0.121 <sup>a</sup>  | 4.22±0.147 <sup>a</sup>  | 4.42±0.224 <sup>a</sup>  | 3.79±0.150 <sup>b</sup>  |
|       | CVFD                | 20.97±0.591              | 20.08±0.662              | 19.69±0.504              | 20.05±0.608              | 19.72±0.930              | 19.30±0.621              |
|       | Curvature (/2.5 cm) | 11.30±0.441 <sup>b</sup> | 12.18±0.493 <sup>b</sup> | 11.08±0.376 <sup>b</sup> | 11.78±0.454 <sup>b</sup> | 11.30±0.693 <sup>b</sup> | 14.65±0.463 <sup>a</sup> |
|       | FW (kg)             | 4.82±0.165 <sup>b</sup>  | 5.04±0.201 <sup>a</sup>  | 4.07±0.162 <sup>b</sup>  | 3.40±0.179 <sup>d</sup>  | 4.61±0.274 <sup>b</sup>  | 4.36±0.184 <sup>b</sup>  |
|       | WFL (cm)            | 9.24±0.263               | 9.27±0.295               | 8.65±0.225               | 8.28±0.271               | 9.13±0.414               | 9.02±0.277               |

a, b,c Means within a row with no common superscript are different ( $P<0.05$ ); MFD, mean wool fiber diameter; FDSD, standard deviation of fiber diameter; CVFD, coefficient of variation of fiber diameter; WFL, wool fiber length; FW, fleece weight; SF, PW, A, B, U and PM represent Super fine wool strain, Prolific wool strain, A strain, B strain, U strain and the Prolific meat strain, respectively; NE stands for not estimable.

**Table S8.** The allele substitution effects of *DKK1* SNPs on wool production and quality traits in Chinese Merino

|      | Traits <sup>1</sup>   | A     | B     | PW    | PM    | U  | SF    |
|------|-----------------------|-------|-------|-------|-------|----|-------|
| SNP1 | MFD ( $\mu\text{m}$ ) | 0.00  | -1.08 | NE    | NE    | NE | 0.76  |
|      | FSD ( $\mu\text{m}$ ) | 0.08  | -0.19 | NE    | NE    | NE | 0.19  |
|      | CVFD                  | 0.42  | -0.11 | NE    | NE    | NE | 0.14  |
|      | Curvature (/2.5 cm)   | -0.02 | 3.96  | NE    | NE    | NE | 0.14  |
|      | FW (kg)               | 0.20  | -0.31 | NE    | NE    | NE | -0.22 |
|      | WFL (cm)              | -0.23 | -0.54 | NE    | NE    | NE | 0.98  |
| SNP2 | MFD ( $\mu\text{m}$ ) | 0.11  | -1.16 | NE    | NE    | NE | 0.75  |
|      | FSD ( $\mu\text{m}$ ) | 0.07  | -0.25 | NE    | NE    | NE | 0.09  |
|      | CVFD                  | 0.25  | -0.25 | NE    | NE    | NE | -0.38 |
|      | Curvature (/2.5 cm)   | -0.07 | 3.91  | NE    | NE    | NE | 0.20  |
|      | FW (kg)               | 0.18  | -0.38 | NE    | NE    | NE | -0.28 |
|      | WFL (cm)              | -0.19 | -0.90 | NE    | NE    | NE | 0.94  |
| SNP3 | MFD ( $\mu\text{m}$ ) | 0.08  | -0.38 | -1.44 | -0.28 | NE | -0.96 |
|      | FSD ( $\mu\text{m}$ ) | 0.00  | -0.25 | -0.42 | 0.29  | NE | -0.07 |
|      | CVFD                  | -0.02 | 0.10  | -0.68 | 1.59  | NE | 0.55  |
|      | Curvature(/2.5 cm)    | -0.22 | 3.72  | -0.92 | 0.84  | NE | 0.85  |
|      | FW(kg)                | 0.04  | -0.34 | -0.47 | 0.81  | NE | -0.17 |
|      | WFL (cm)              | -0.09 | -0.89 | 0.98  | 0.95  | NE | 0.36  |
| SNP4 | MFD ( $\mu\text{m}$ ) | 0.27  | -0.91 | NE    | NE    | NE | 0.69  |
|      | FSD ( $\mu\text{m}$ ) | 0.18  | -0.18 | NE    | NE    | NE | 0.12  |
|      | CVFD                  | 0.61  | -0.14 | NE    | NE    | NE | -0.13 |
|      | Curvature (/2.5 cm)   | -0.17 | 3.21  | NE    | NE    | NE | 0.20  |
|      | FW (kg)               | 0.26  | -0.28 | NE    | NE    | NE | -0.20 |
|      | WFL (cm)              | -0.29 | -0.57 | NE    | NE    | NE | 0.94  |
| SNP5 | MFD ( $\mu\text{m}$ ) | -0.24 | 0.11  | NE    | NE    | NE | -0.45 |
|      | FSD ( $\mu\text{m}$ ) | -0.14 | 0.06  | NE    | NE    | NE | -0.09 |
|      | CVFD                  | -0.48 | 0.38  | NE    | NE    | NE | 0.08  |
|      | Curvature (/2.5 cm)   | 0.13  | -3.32 | NE    | NE    | NE | -0.23 |
|      | FW (kg)               | -0.32 | 0.42  | NE    | NE    | NE | 0.15  |
|      | WFL (cm)              | 0.46  | 0.16  | NE    | NE    | NE | -0.97 |
| SNP6 | MFD ( $\mu\text{m}$ ) | -0.12 | -0.13 | -0.49 | -0.53 | NE | -1.02 |
|      | FSD ( $\mu\text{m}$ ) | -0.25 | 0.22  | -0.48 | -0.28 | NE | -0.19 |
|      | CVFD                  | -1.03 | 0.42  | -1.84 | -0.91 | NE | 0.03  |
|      | Curvature (/2.5 cm)   | 0.16  | -0.70 | -1.27 | 0.86  | NE | 0.63  |
|      | FW (kg)               | -0.21 | -0.07 | -0.02 | -0.67 | NE | -0.18 |
|      | WFL (cm)              | -0.04 | -0.51 | 0.64  | -0.47 | NE | -0.10 |
| SNP7 | MFD ( $\mu\text{m}$ ) | 0.21  | 0.37  | -0.21 | -0.46 | NE | -1.25 |

|       |                       |       |       |       |       |       |       |
|-------|-----------------------|-------|-------|-------|-------|-------|-------|
|       | FDS <sub>D</sub> (μm) | -0.23 | 0.13  | -0.49 | -0.13 | NE    | -0.15 |
|       | CVFD                  | -1.28 | 0.02  | -2.07 | -0.24 | NE    | 0.56  |
|       | Curvature (/2.5 cm)   | 0.16  | -0.23 | -0.94 | 0.79  | NE    | 0.69  |
|       | FW (kg)               | -0.39 | -0.29 | -0.23 | -0.43 | NE    | -0.09 |
|       | WFL (cm)              | 0.10  | -0.46 | 0.86  | 0.06  | NE    | -0.49 |
| SNP8  | MFD (μm)              | -2.39 | NE    | 0.56  | -0.52 | NE    | NE    |
|       | FDS <sub>D</sub> (μm) | -0.18 | NE    | 0.21  | 0.00  | NE    | NE    |
|       | CVFD                  | 1.44  | NE    | 0.44  | 0.53  | NE    | NE    |
|       | Curvature (/2.5 cm)   | 0.75  | NE    | 0.25  | 0.02  | NE    | NE    |
|       | FW (kg)               | 0.50  | NE    | -0.03 | 0.49  | NE    | NE    |
|       | WFL (cm)              | 0.06  | NE    | -0.85 | 0.01  | NE    | NE    |
| SNP9  | MFD (μm)              | 0.18  | -0.03 | 0.18  | 0.20  | 2.36  | -0.26 |
|       | FDS <sub>D</sub> (μm) | -0.09 | -0.07 | -0.24 | 0.12  | 0.59  | -0.07 |
|       | CVFD                  | -0.64 | -0.25 | -1.30 | 0.36  | 0.35  | -0.12 |
|       | Curvature (/2.5 cm)   | -0.03 | -0.73 | -0.58 | 0.12  | -3.75 | 0.33  |
|       | FW (kg)               | -0.29 | -0.21 | 0.00  | 0.16  | -0.13 | -0.22 |
|       | WFL (cm)              | -0.17 | -0.52 | -0.29 | 0.48  | 0.41  | -0.18 |
| SNP10 | MFD(μm)               | 0.15  | 0.46  | -0.28 | NE    | NE    | 0.42  |
|       | FDS <sub>D</sub> (μm) | 0.23  | 0.03  | 0.24  | NE    | NE    | 0.06  |
|       | CVFD                  | 0.94  | -0.35 | 1.34  | NE    | NE    | -0.09 |
|       | Curvature(/2.5 cm)    | -0.22 | -0.50 | 0.95  | NE    | NE    | -0.13 |
|       | FW(kg)                | 0.15  | 0.16  | 0.29  | NE    | NE    | 0.22  |
|       | WFL (cm)              | -0.10 | 0.69  | -0.40 | NE    | NE    | 0.17  |
| SNP11 | MFD (μm)              | 0.33  | -0.81 | 0.46  | 0.19  | NE    | 0.16  |
|       | FDS <sub>D</sub> (μm) | 0.24  | -0.05 | 0.33  | 0.07  | NE    | 0.01  |
|       | CVFD                  | 0.78  | -1.03 | 1.11  | 0.16  | NE    | -0.09 |
|       | Curvature (/2.5 cm)   | 0.03  | 0.70  | -0.13 | 0.20  | NE    | -0.29 |
|       | FW (kg)               | 0.21  | 0.15  | 0.03  | 0.31  | NE    | 0.02  |
|       | WFL (cm)              | -0.15 | -0.31 | 0.27  | 0.05  | NE    | 0.04  |

MFD, mean wool fiber diameter; FDS<sub>D</sub>, standard deviation of fiber diameter; CVFD, coefficient of variation of fiber diameter; WFL, wool fiber length; FW, fleece weight; SF, PW, A, B, U and PM represent Super fine wool strain, Prolific wool strain, A strain, B strain, U strain and the Prolific meat strain, respectively; NE stands for not estimable.

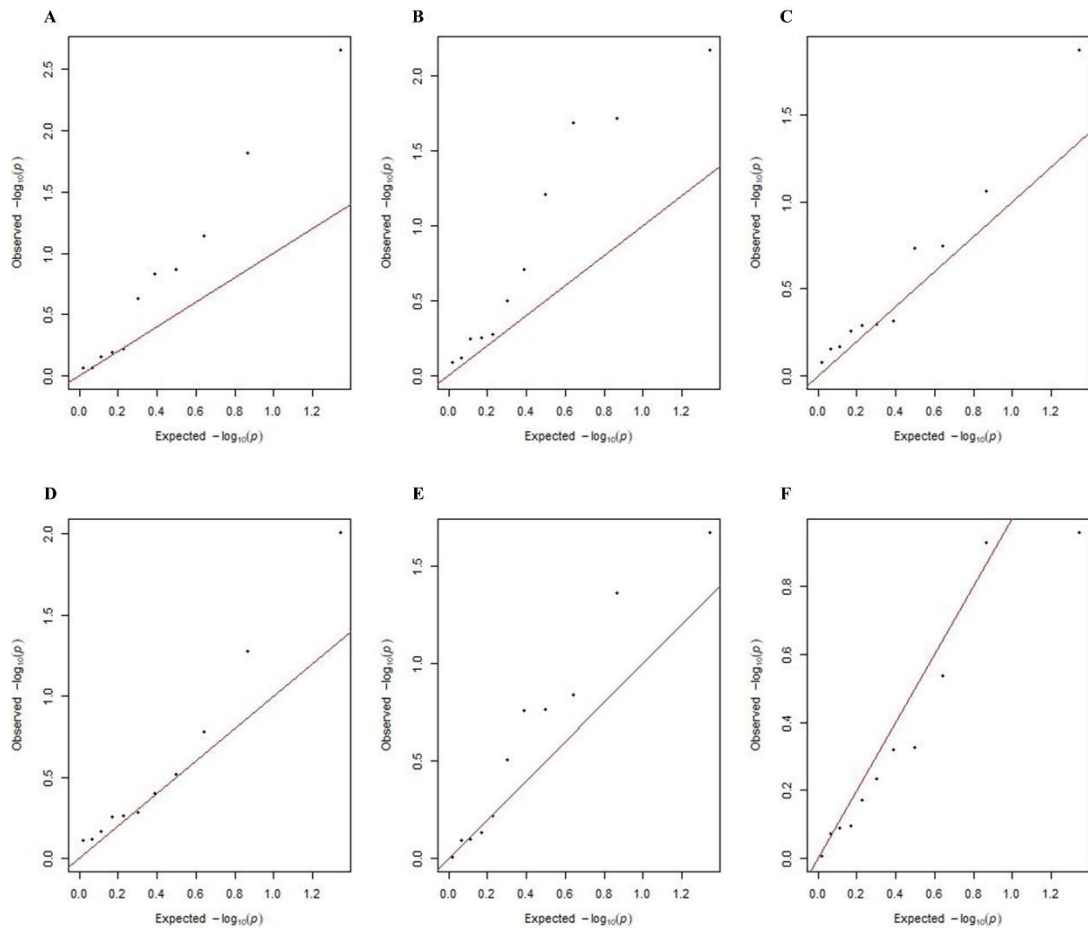

**Figure S1.** The corresponding quantile–quantile (Q-Q) plots for the association p values of *DKK1* SNPs. The red line shows the expected distribution of P-values; the black line shows the observed distribution of P-values. Fig.S1-A, S1-B, S1-C, S1-D, S1-E, S1-F refer to plot for MFD, FDSD, CVFD, Curvature, FW, and WFL respectively.
